# Supplementary material
Source: Elsevier journal article supplement (https://www.sciencedirect.com/science/article/pii/S0213911118302346)
Supplement: mmc2 [file S0213911118302346:mmc2.docx]

**Appendix 2**

**Figure I.** Mean utility of all studied samples.

**Figure II.** Mean utility of all studied samples not being in perfect health.
